# Supplementary material for: Psychological and Educational Factors of Digital Competence Optimization Interventions Pre- and Post-COVID-19 Lockdown: A Systematic Review
Source: MDPI journal article supplement (doi:10.3390/su16010051), 2023-12-20
Supplement: s1 [file s1]

Archive with 1 entries (1 files):
- sustainability-2737398-supplementary.pdf
